# Supplementary material for: Spectroscopy, molecular structure, and electropolymerization of Ni(ii) and Cu(ii) complexes containing a thiophene-appending fluorinated Schiff base ligand
Source: Royal Society of Chemistry journal article supplement (doi:10.1039/d3dt00224a), 2023-01-01
Supplement: d3dt00224a3.pdf [file d3dt00224a3.pdf]

## Electronic Supplementary Information

### Spectroscopy, molecular structure and electropolymerization of Ni (II) and Cu (II) complexes containing a thiophene-appending fluorinated Schiff base ligand

Guillermo Ahumada, Paul Hamon, Thierry Roisnel, Vincent Dorcet, Mauricio Fuentealba, Loreto Hernandez, David Carrillo, Jean-René Hamon, Carolina Manzur

---

#### Contents

|                                                                                                                                                                    |    |
|--------------------------------------------------------------------------------------------------------------------------------------------------------------------|----|
| <b>Fig. S1</b> Molecular structure of the diimine <b>1</b> showing the atom labeling scheme.                                                                       | 2  |
| <b>Fig. S2</b> <sup>13</sup> C NMR spectrum of the Schiff base proligand <b>2</b> recorded in (CD <sub>3</sub> ) <sub>2</sub> CO at 298 K.                         | 3  |
| <b>Fig. S3</b> <sup>1</sup> H NMR spectrum of the Schiff base proligand <b>2</b> recorded in (CD <sub>3</sub> ) <sub>2</sub> CO at 298 K.                          | 3  |
| <b>Fig. S4</b> FT-IR solid-state spectra (KBr disk) of compounds <b>2-6</b> .                                                                                      | 4  |
| <b>Fig. S5</b> <sup>1</sup> H NMR spectrum of the Schiff base complex <b>3</b> recorded in (CD <sub>3</sub> ) <sub>2</sub> CO at 298 K.                            | 5  |
| <b>Fig. S6</b> <sup>1</sup> H NMR spectrum of the thiophene-appending Schiff base complex <b>5</b> recorded in CDCl <sub>3</sub> at 298 K.                         | 5  |
| <b>Fig. S7</b> <sup>13</sup> C{ <sup>1</sup> H} NMR spectrum of the Schiff base complex <b>3</b> recorded in (CD <sub>3</sub> ) <sub>2</sub> CO at 298 K.          | 6  |
| <b>Fig. S8</b> <sup>13</sup> C{ <sup>1</sup> H} NMR spectrum of the thiophene-appending Schiff base complex <b>5</b> recorded in CDCl <sub>3</sub> at 298 K.       | 6  |
| <b>Fig. S9</b> Molecular structure of the Cu(II) Schiff base complex <b>4</b> with its labeling scheme.                                                            | 7  |
| <b>Fig. S10</b> Intermolecular hydrogen bond interactions observed in the solid-state structures of Schiff base proligand <b>2</b> .                               | 7  |
| <b>Fig. S11</b> Optimized geometries of <b>5</b> (left) and <b>6</b> (right).                                                                                      | 8  |
| <b>Fig. S12</b> Computed spin density of the ground state of the Cu(II) complex <b>6</b> .                                                                         | 8  |
| <b>Fig. S13</b> TD-DFT simulated UV-vis spectra of compounds <b>5</b> and <b>6</b> .                                                                               | 8  |
| <b>Table S1</b> Selected bond distances (Å) and angles (°) of the fluorinated Schiff base proligand <b>2</b> .                                                     | 9  |
| <b>Table S2</b> Selected bond distances (Å) and angles (°) of Schiff base ligands in compounds <b>3</b> , <b>4</b> and <b>5</b> ·CH <sub>2</sub> Cl <sub>2</sub> . | 10 |
| <b>Table S3</b> Intramolecular hydrogen bonding parameters for the fluorinated Schiff base proligand <b>2</b> .                                                    | 11 |

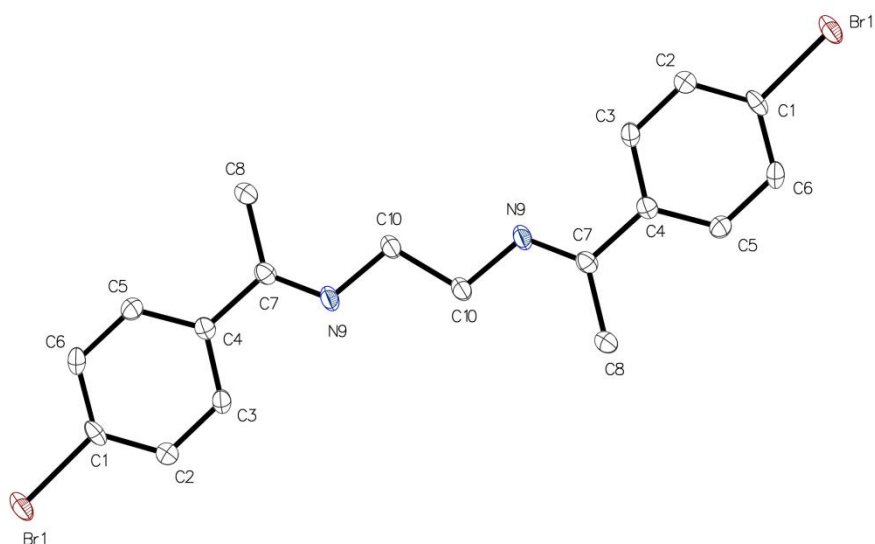

**Fig. S1** Molecular structure of the diimine **1** showing the atom labeling scheme. Hydrogen atoms are omitted for clarity. Thermal ellipsoids are drawn at 50% probability. Selected bond distances (Å) and angles (°): C(1)-Br(1) 1.903(3), C(4)-C(7) 1.493(4), N(9)-C(7) 1.275(4), C(7)-C(8) 1.504(4), N(9)-C(10) 1.468(3), C(10)-C(10)<sup>#</sup> 1.506(6); N(9)-C(7)-C(4) 116.9(3), N(9)-C(7)-C(8) 124.9(3), C(7)-N(9)-C(10) 119.1(3), N(9)-C(10)-C(10)<sup>#</sup> 109.3(3), C(2)-C(1)-Br(1) 118.6(2), C(6)-C(1)-Br(1) 120.0(2). Symmetry transformations used to generate equivalent atoms: # -x, -y, -z.

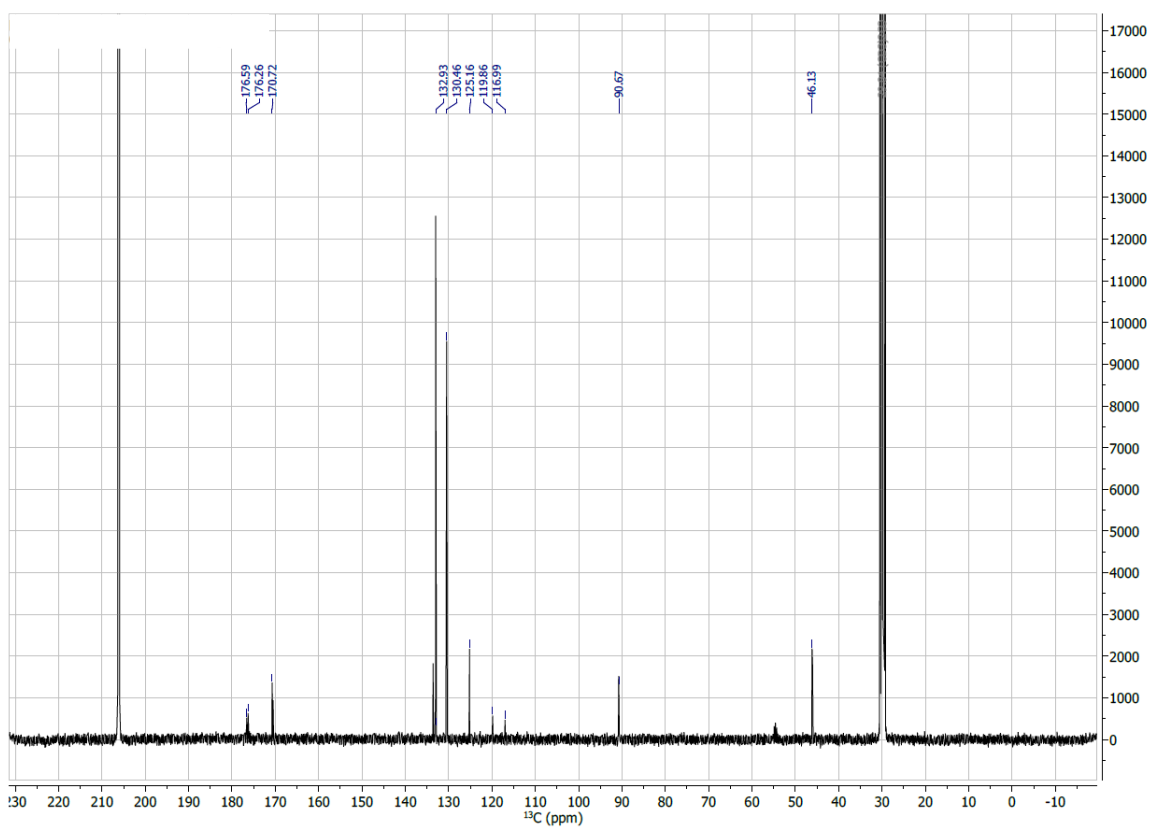

**Fig. S2** <sup>13</sup>C{<sup>1</sup>H} NMR spectrum of the Schiff base proligand **2** recorded in (CD<sub>3</sub>)<sub>2</sub>CO at 298 K.

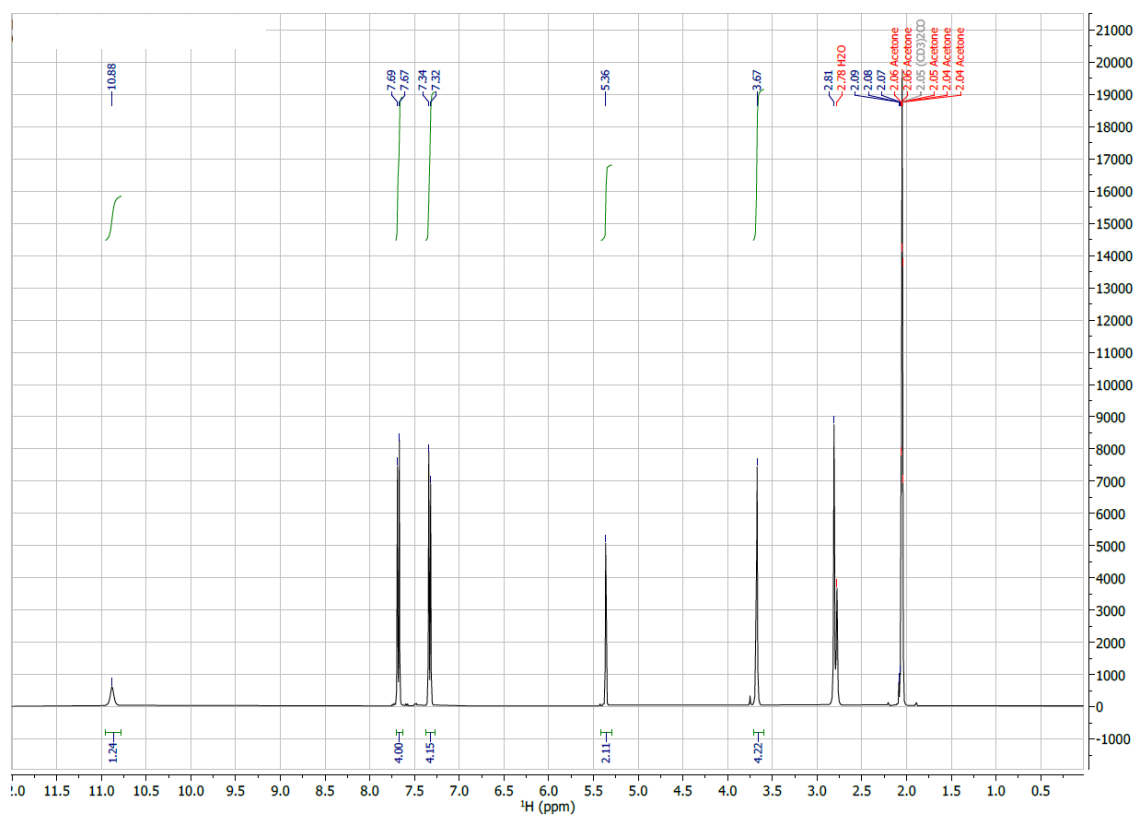

**Fig. S3** <sup>1</sup>H NMR spectrum of the Schiff base proligand **2** recorded in (CD<sub>3</sub>)<sub>2</sub>CO at 298 K.

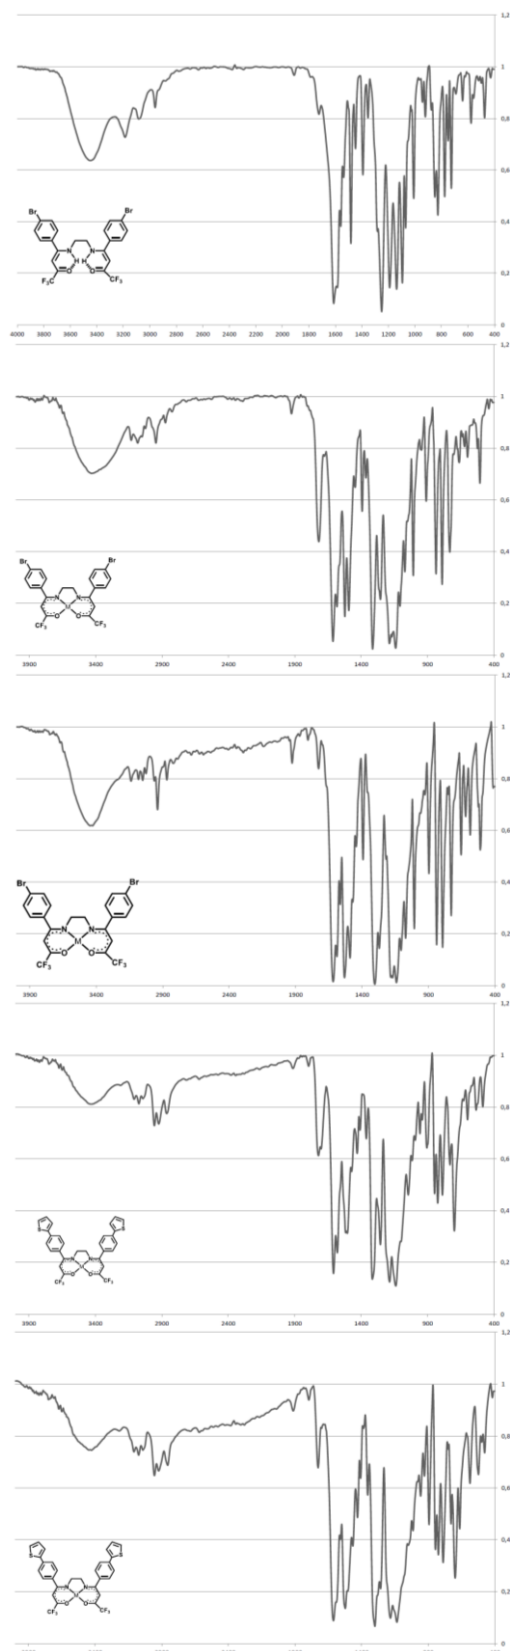

**Fig. S4** FT-IR solid-state spectra (KBr disk) of compounds **2-6** (from top to bottom).

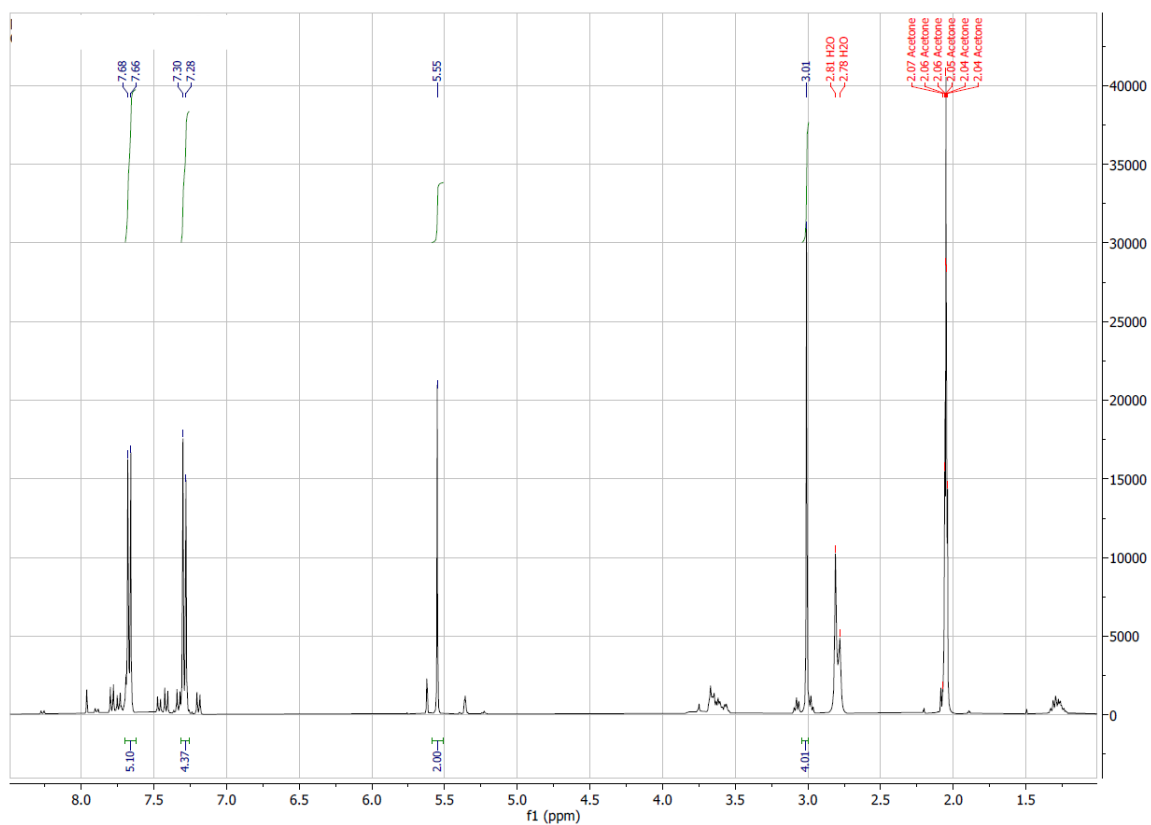

**Fig. S5**  $^1\text{H}$  NMR spectrum of the Schiff base complex **3** recorded in  $(\text{CD}_3)_2\text{CO}$  at 298 K.

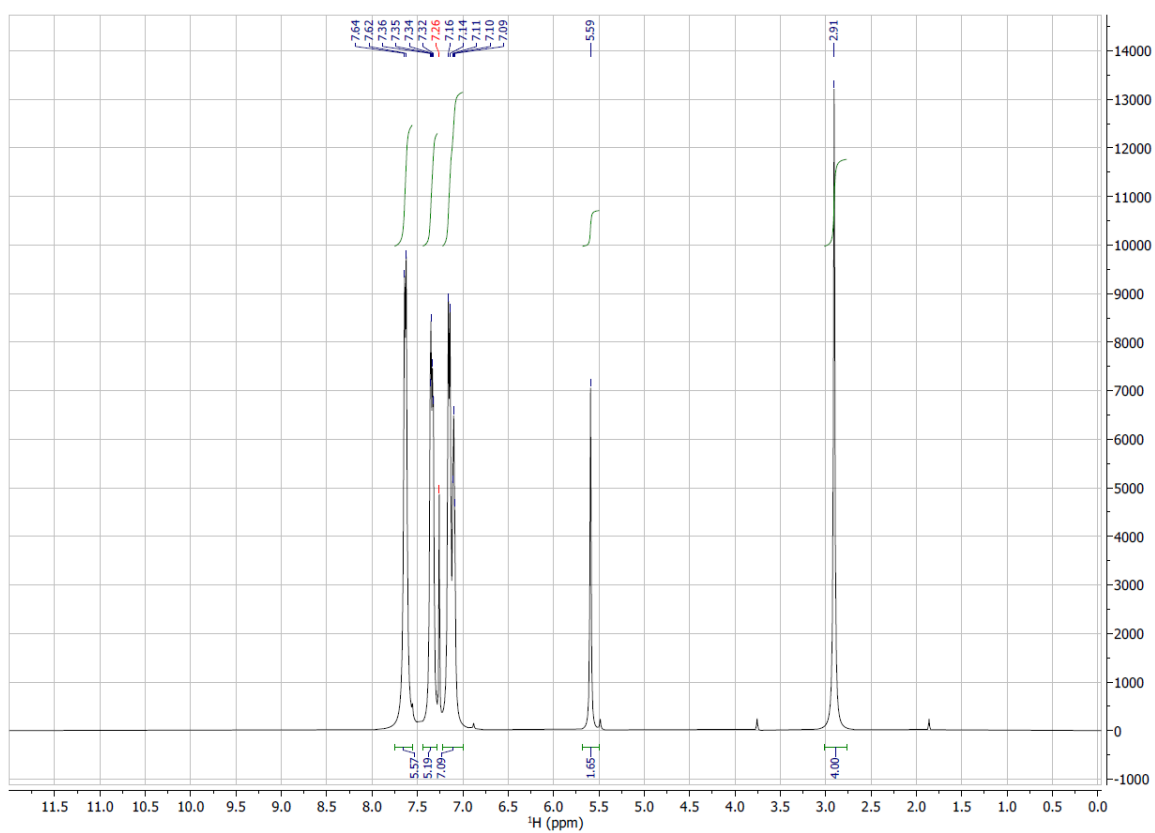

**Fig. S6**  $^1\text{H}$  NMR spectrum of the thiophene-appending Schiff base complex **5** recorded in  $\text{CDCl}_3$  at 298 K.

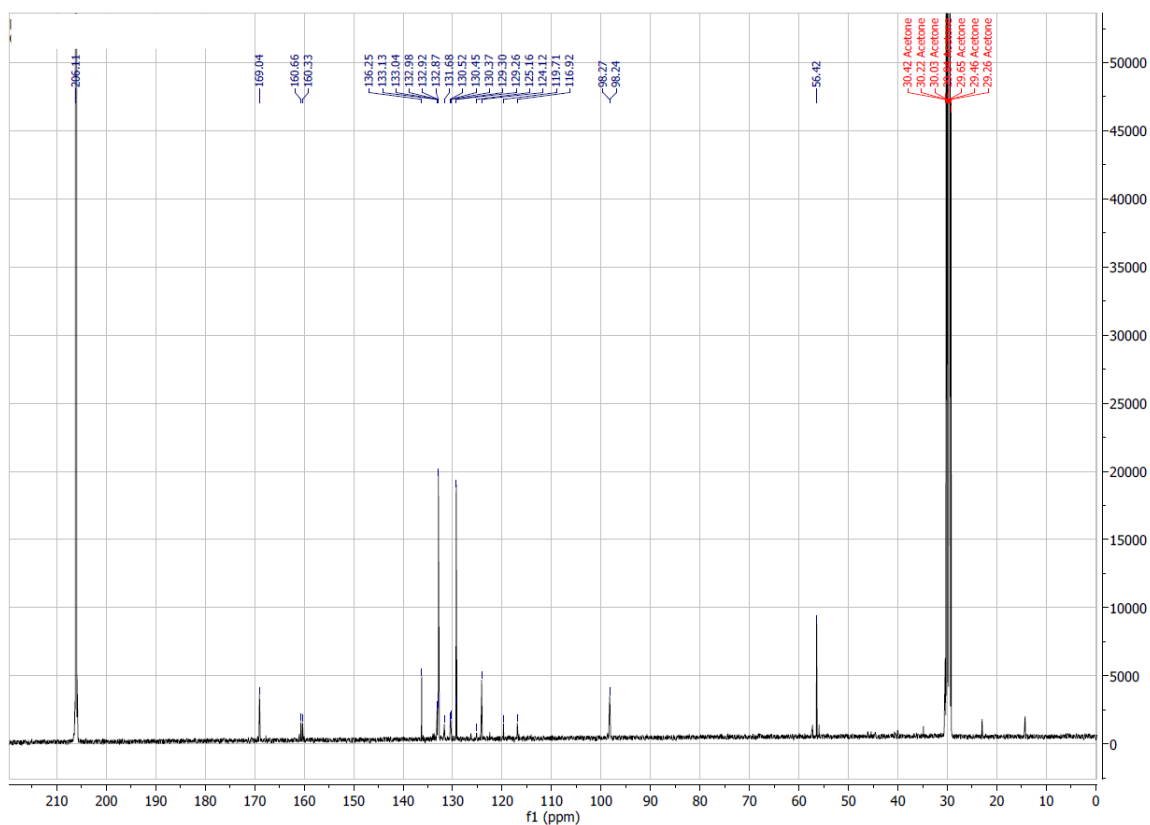

**Fig. S7**  $^{13}\text{C}\{^1\text{H}\}$  NMR spectrum of the Schiff base complex **3** recorded in  $(\text{CD}_3)_2\text{CO}$  at 298 K.

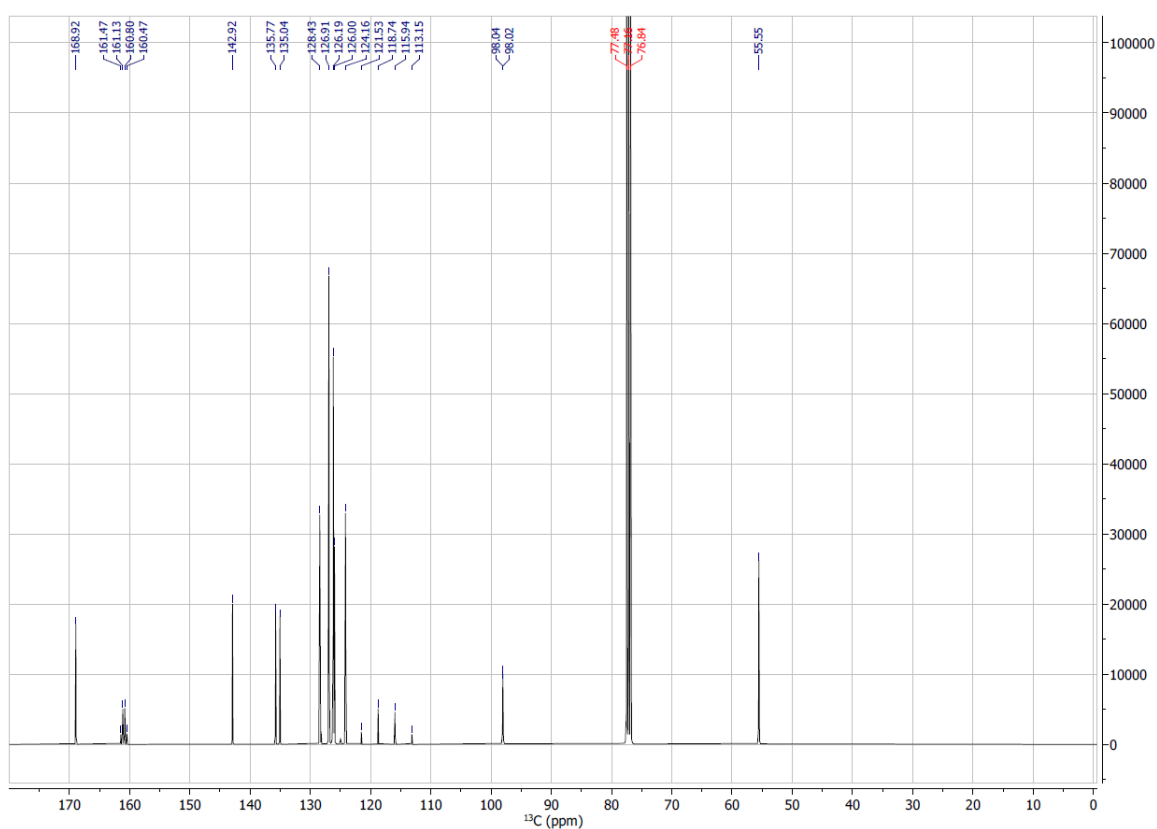

**Fig. S8**  $^{13}\text{C}\{^1\text{H}\}$  NMR spectrum of the thiophene-appending Schiff base complex **5** recorded in  $\text{CDCl}_3$  at 298 K.

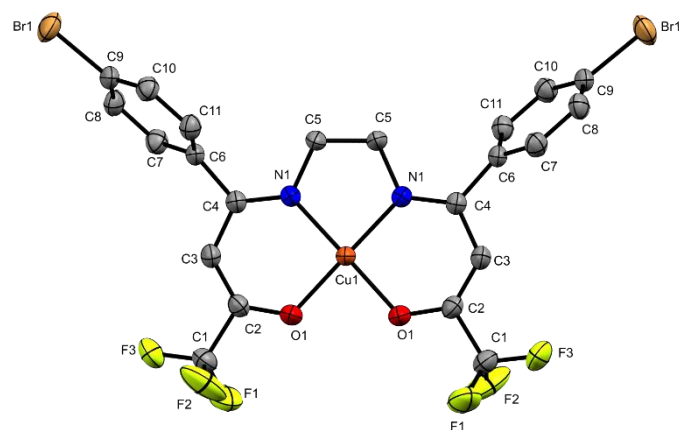

**Fig. S9** Molecular structure of the Cu(II) Schiff base complex **4** with its labeling scheme. Hydrogen atoms are omitted for clarity. Thermal ellipsoids are drawn at 50% probability.

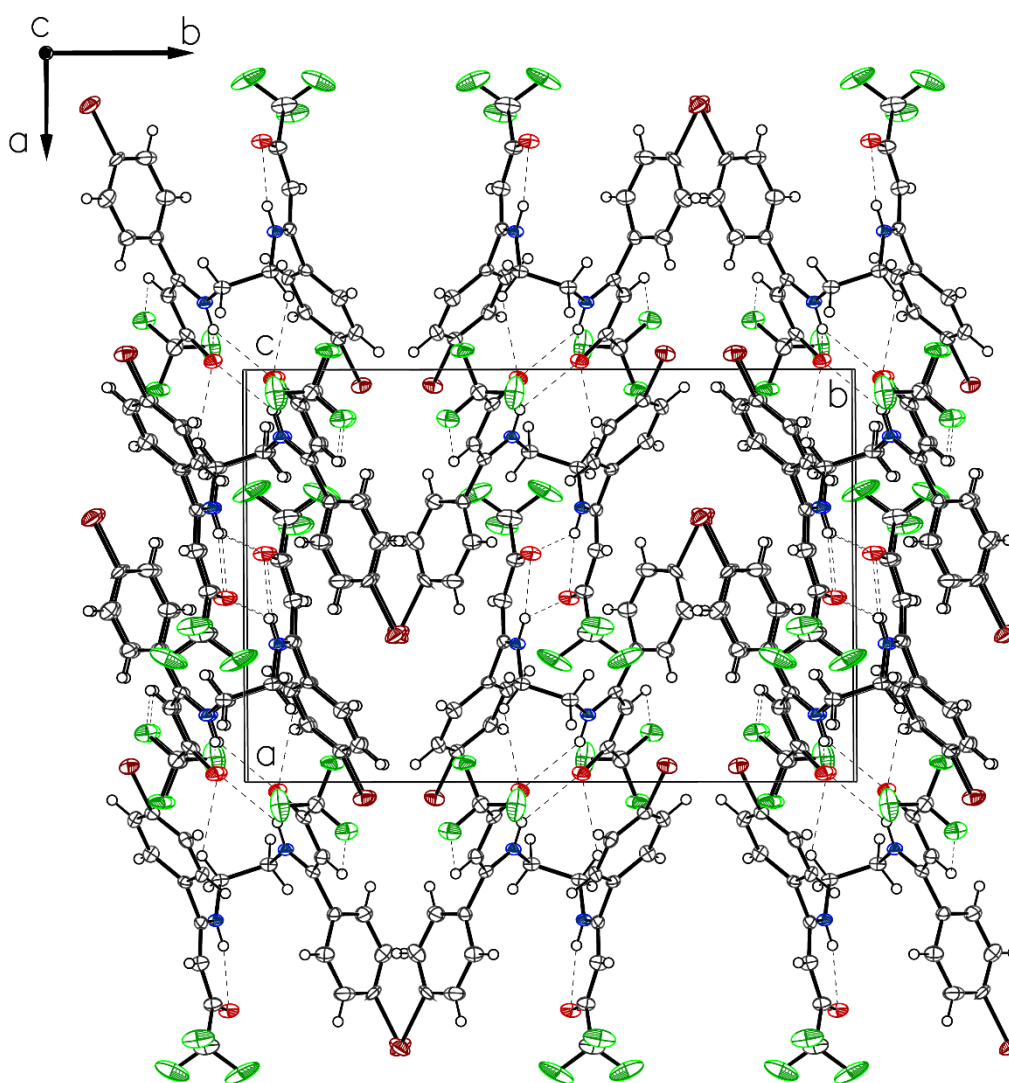

**Fig. S10** Intermolecular hydrogen bond interactions observed in the solid-state structures of Schiff base proligand **2**.

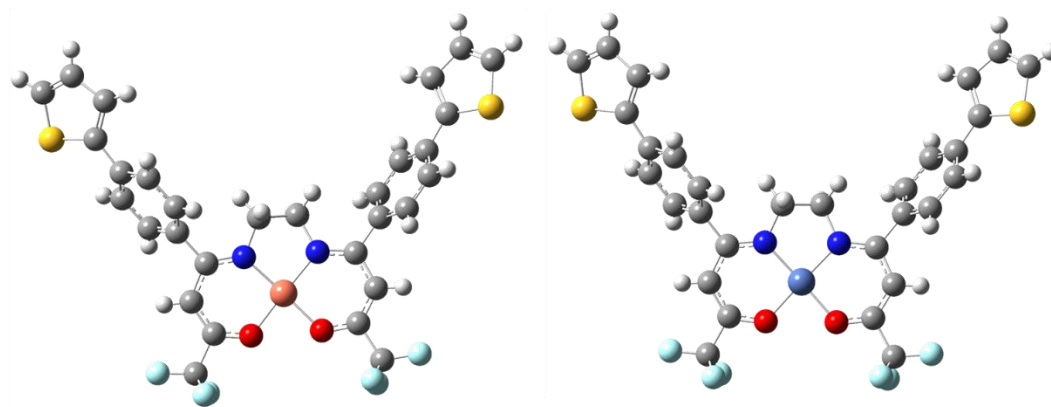

**Fig. S11** Optimized geometries of **5** (left) and **6** (right).

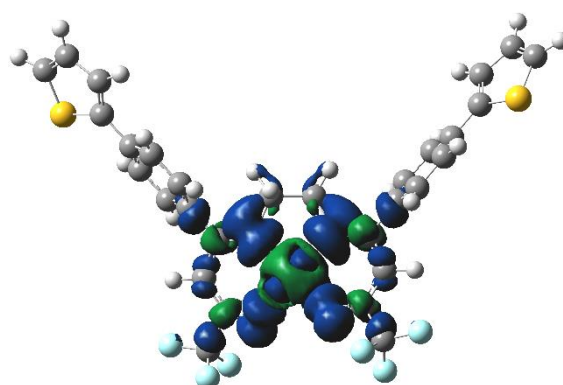

**Fig. S12** Computed spin density of the ground state of the Cu(II) complex **6**.

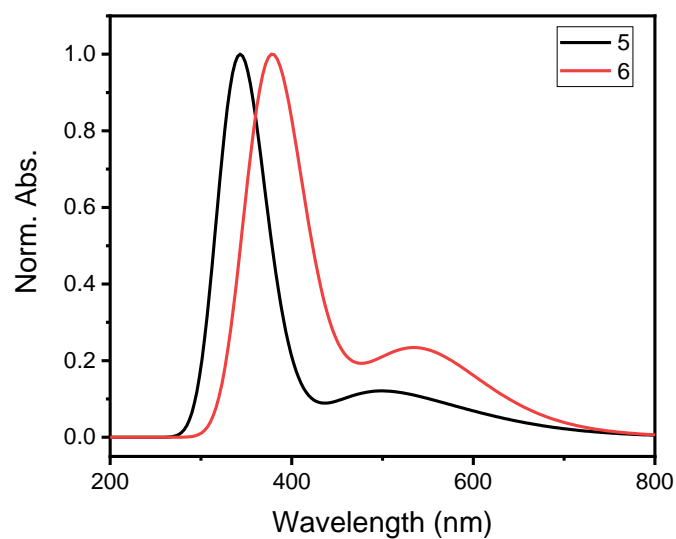

**Fig. S13** TD-DFT simulated UV-vis spectra of compounds **5** and **6**.



**Table S1** Selected bond distances (Å) and angles (°) of the fluorinated Schiff base proligand **2**.

| Bond distances |          |             |          |
|----------------|----------|-------------|----------|
| O(1)-C(2)      | 1.248(4) | O(2)-C(22)  | 1.239(4) |
| N(1)-C(4)      | 1.323(4) | N(2)-C(24)  | 1.328(4) |
| N(1)-C(5)      | 1.459(4) | N(2)-C(25)  | 1.464(4) |
| C(1)-C(2)      | 1.533(5) | C(21)-C(22) | 1.537(4) |
| C(2)-C(3)      | 1.393(4) | C(22)-C(23) | 1.408(4) |
| C(3)-C(4)      | 1.398(4) | C(23)-C(24) | 1.389(4) |
| C(4)-C(6)      | 1.492(4) | C(24)-C(26) | 1.493(4) |
| C(1)-F(1)      | 1.327(5) | C(21)-F(4)  | 1.331(4) |
| C(1)-F(2)      | 1.337(5) | C(21)-F(5)  | 1.336(4) |
| C(1)-F(3)      | 1.331(4) | C(21)-F(6)  | 1.331(4) |
| C(9)-Br(1)     | 1.900(3) | C(29)-Br(2) | 1.903(3) |
| C(5)-C(25)     | 1.515(5) |             |          |

  

| Bond angles      |           |                   |           |
|------------------|-----------|-------------------|-----------|
| O(1)-C(2)-C(1)   | 115.40(3) | O(2)-C(22)-C(21)  | 115.50(3) |
| O(1)-C(2)-C(3)   | 127.10(3) | O(2)-C(22)-C(23)  | 127.10(3) |
| N(1)-C(4)-C(3)   | 121.50(3) | N(2)-C(24)-C(23)  | 122.10(3) |
| N(1)-C(4)-C(6)   | 121.70(3) | N(2)-C(24)-C(26)  | 119.30(3) |
| C(4)-N(1)-C(5)   | 127.60(3) | C(24)-N(2)-C(25)  | 127.10(3) |
| C(2)-C(3)-C(4)   | 123.70(3) | C(22)-C(23)-C(24) | 122.50(3) |
| N(1)-C(5)-C(25)  | 112.80(3) | N(2)-C(25)-C(5)   | 111.20(3) |
| C(8)-C(9)-Br(1)  | 118.70(2) | C(28)-C(29)-Br(2) | 118.80(3) |
| C(10)-C(9)-Br(1) | 119.60(3) | C(30)-C(29)-Br(2) | 119.50(3) |

**Table S2** Selected bond distances (Å) and angles (°) of Schiff base ligands in compounds **3**, **4** and **5**·CH<sub>2</sub>Cl<sub>2</sub>.<sup>a</sup>

|                             | <b>3</b>  | <b>4</b>   | <b>5</b> ·CH <sub>2</sub> Cl <sub>2</sub> |
|-----------------------------|-----------|------------|-------------------------------------------|
| Bond distances              |           |            |                                           |
| O(1)-C(2)                   | 1.297(10) | 1.283(3)   | 1.288(5)                                  |
| N(1)-C(4)                   | 1.315(10) | 1.310(3)   | 1.314(5)                                  |
| N(1)-C(5)                   | 1.470(9)  | 1.478(3)   | 1.477(5)                                  |
| C(2)-C(3)                   | 1.355(11) | 1.360(4)   | 1.353(6)                                  |
| C(3)-C(4)                   | 1.437(10) | 1.430(4)   | 1.420(5)                                  |
| C(5)-C(5) <sup>#</sup>      | 1.526(15) | 1.532(5)   | 1.495(9)                                  |
| C(1)-C(2)                   | 1.521(11) | 1.520(4)   | 1.517(6)                                  |
| C(4)-C(6)                   | 1.499(10) | 1.498(4)   | 1.492(6)                                  |
| C(1)-F(1)                   | 1.321(11) | 1.326(4)   | 1.308(8)                                  |
| C(1)-F(2)                   | 1.339(10) | 1.308(4)   | 1.315(7)                                  |
| C(1)-F(3)                   | 1.325(10) | 1.333(4)   | 1.307(8)                                  |
| C(9)-X <sup>b</sup>         | 1.902(8)  | 1.898(3)   | 1.464(6)                                  |
| S(1)-C(12)                  | -         | -          | 1.703(5)                                  |
| S(1)-C(15)                  | -         | -          | 1.682(7)                                  |
| Bond angles                 |           |            |                                           |
| M(1)-O(1)-C(2)              | 123.70(5) | 122.77(18) | 124.50(3)                                 |
| M(1)-N(1)-C(4)              | 126.00(5) | 126.17(19) | 127.60(3)                                 |
| M(1)-N(1)-C(5)              | 113.40(5) | 112.21(16) | 112.00(2)                                 |
| O(1)-C(2)-C(3)              | 128.40(7) | 129.30(3)  | 127.80(4)                                 |
| O(1)-C(2)-C(1)              | 111.70(7) | 111.80(2)  | 111.90(4)                                 |
| N(1)-C(4)-C(3)              | 122.80(7) | 121.80(2)  | 121.40(4)                                 |
| C(4)-N(1)-C(5)              | 120.40(6) | 121.50(2)  | 120.40(3)                                 |
| N(1)-C(5)-C(5) <sup>#</sup> | 106.80(5) | 108.67(17) | 106.90(3)                                 |
| N(1)-C(4)-C(6)              | 122.60(7) | 123.30(2)  | 122.40(3)                                 |
| C(2)-C(3)-C(4)              | 122.00(7) | 124.40(2)  | 123.20(4)                                 |
| C(8)-C(9)-X <sup>b</sup>    | 118.60(6) | 120.00(2)  | 119.80(4)                                 |
| C(10)-C(9)-X <sup>b</sup>   | 119.10(6) | 118.50(2)  | 122.00(4)                                 |
| C(12)-S(1)-C(15)            | -         | -          | 93.10(3)                                  |

<sup>a</sup>M = Ni, **3** and **5**·CH<sub>2</sub>Cl<sub>2</sub>; Cu, **4**. <sup>b</sup>X = Br, **3** and **4**; C(12), **5**. Symmetry transformations used to generate equivalent atoms: # -x, y, -z+1/2

**Table S3** Intramolecular hydrogen bonding parameters for the fluorinated Schiff base proligand**2.**

| D-H...A (Å)                       | D-H (Å) | H...A (Å) | D...A (Å) | D—H...A (°) |
|-----------------------------------|---------|-----------|-----------|-------------|
| N(1)-H(1)...O(1)                  | 0.88    | 2.04      | 2.734(3)  | 135.4       |
| N(2)-H(2)...O(2)                  | 0.88    | 2.03      | 2.712(3)  | 133.4       |
| N(1)-H(1)...O(1) <sup>#1</sup>    | 0.88    | 2.32      | 3.007(3)  | 134.9       |
| N(2)-H(1)...O(2) <sup>#2</sup>    | 0.88    | 2.39      | 3.055(4)  | 132.2       |
| C(8)-H(7)...F(4)                  | 0.95    | 2.95      | 3.202(4)  | 120.5       |
| C(10)-H(9)...Br(1) <sup>#3</sup>  | 0.95    | 3.10      | 3.924(3)  | 145.7       |
| C(5)-H11A)...O(2) <sup>#2</sup>   | 0.99    | 2.51      | 3.254(4)  | 131.4       |
| C(5)-H11A)...F(5) <sup>#2</sup>   | 0.99    | 2.63      | 3.185(4)  | 115.9       |
| C(25)-H(12A)...O(1) <sup>#1</sup> | 0.99    | 2.52      | 3.268(4)  | 132.3       |

Symmetry transformations used to generate equivalent atoms:

#1 -x, -y, -z T = [1, 0, 0];

#2 -x, -y, -z T = [2, 0, 0];

#3 x, -y-1/2, z-1/2 T = [0, 0, 0].
